# Supplementary material for: A genome-wide association study of plasma concentrations of warfarin enantiomers and metabolites in sub-Saharan black-African patients
Source: Front Pharmacol. 2022 Sep 23;13:967082. doi: 10.3389/fphar.2022.967082 (PMC9537548; doi:10.3389/fphar.2022.967082)
Supplement: Supplementary file 2 [file DataSheet2.XLSX]

## Sheet: study
A unique free-text label for each genome-wide association study in the publication	The GWAS Catalog study accession identifying a published study Example: GCST007280	The trait under investigation Example: reticulocyte count	EFOs that best matching the "trait" Example: EFO_0007986 Multiple values can be listed separated by '|'.	Any background trait(s) shared by all individuals in the GWAS (e.g. in both cases and controls) Example: Nicotine dependence	EFOs that best match entered “background trait” Example: EFO_0003768 Multiple values can be listed separated by '|'.	File name of your summary statistics data e.g. my_sumstats.tsv. 'NR' if not providing summary statistics.	Enter yes if summary statistics are available for this study Example: yes, no	Enter yes if the study is a GxE interaction analysis Example: yes, no	Enter yes if the study design uses pooled DNA from multiple individuals Example: yes, no
Study tag	Study Accession	Reported trait	Mapped trait	Background trait	Mapped background trait	Summary statistics file	Sumstats	GxE	Pooled
WARPATH_Swarfarin	GCST90129562	S-warfarin				WARPATH_Swarfarin.tsv.gz
WARPATH_Rwarfarin	GCST90129563	R-warfarin				WARPATH_Rwarfarin.tsv.gz
WARPATH_RSwarfarin	GCST90129564	RS-warfarin				WARPATH_RSwarfarin.tsv.gz
WARPATH_S6OH	GCST90129565	S-6OH-warfarin				WARPATH_S6OH.tsv.gz
WARPATH_R6OH	GCST90129566	R-6OH-warfarin				WARPATH_R6OH.tsv.gz
WARPATH_RS60H	GCST90129567	RS-6OH-warfarin				WARPATH_RS60H.tsv.gz
WARPATH_S7OH	GCST90129568	S-7OH-warfarin				WARPATH_S7OH.tsv.gz
WARPATH_10OH	GCST90129569	RS-10-hydroxywarfarin				WARPATH_10OH.tsv.gz
WARPATH_S_R_ratio	GCST90129570	S-warfarin/R-warfarin				WARPATH_S_R_ratio.tsv.gz
WARPATH_S_7OHS_ratio	GCST90129571	S-6OH-warfarin/S-warfarin				WARPATH_S_6OHS_ratio.tsv.gz
WARPATH_S_6OHS_ratio	GCST90129572	R-6OH-warfarin/R-warfarin				WARPATH_R_6OHR_ratio.tsv.gz
WARPATH_R_6OHR_ratio	GCST90129573	S-7OH-warfarin/S-warfarin				WARPATH_S_7OHS_ratio.tsv.gz
WARPATH_RS_RS10_ratio	GCST90129574	RS-10hydroxywarfarin/RS-warfarin				WARPATH_RS_RS10_ratio.tsv.gz

## Sheet: dropdown
ss_flag	gxe_flag	pooled_flag
Yes	Yes	Yes
No	No	No

## Sheet: meta
Key	Value
schemaVersion	1.10
submissionType	GCST
creation date	2022/07/18
headerSize	3
